# Supplementary figures and images for: River Branch Inspired Janus Textile with Moisture Wicking and UV Resistant Properties
Source: Research Square preprint supplement (doi:10.21203/rs.3.rs-390998/v1), 2021-04-26

**Graphic abstract**


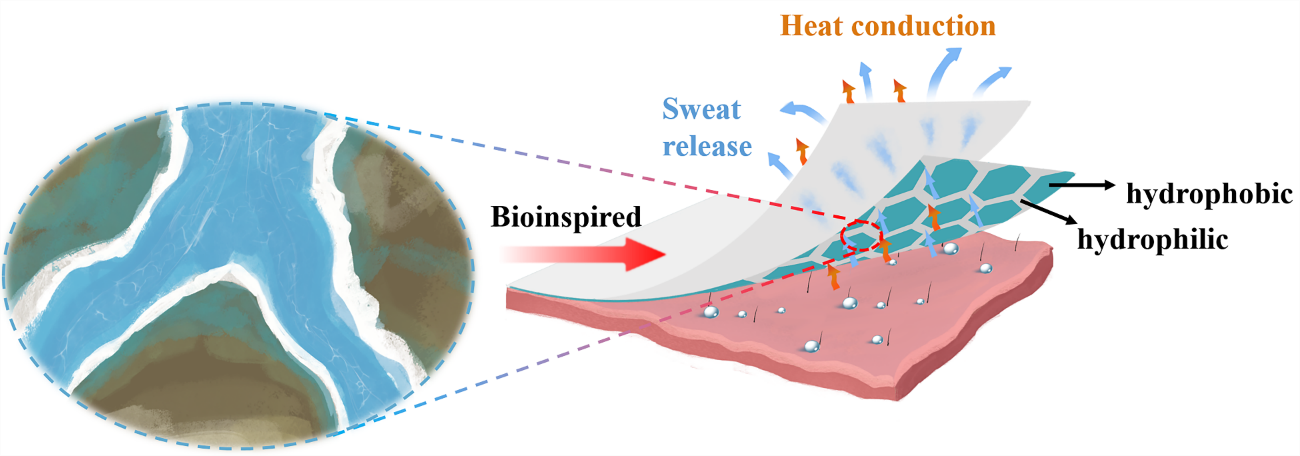

Supplement: Supplementary file 1 [file 5fde880c3dc6d03141087089.docx]
